# Supplementary material for: Venom Ontogeny in the Mexican Lance-Headed Rattlesnake (Crotalus polystictus)
Source: Toxins (Basel). 2018 Jul 3;10(7):271. doi: 10.3390/toxins10070271 (PMC6070973; doi:10.3390/toxins10070271)
Supplement: Supplementary file 1 [file toxins-10-00271-s001.xlsx]

## Sheet: Supp. Table 1
Supplemental Table 1.Full list of peptides identified following shotgun proteomic analysis of a pooled (3 adult and 3 female) Crotalus polystictus venom sample.
	Approximate
Intact Mass (Da)	Molecular mass	m/z	z	Peptide Sequence	Protein family
58664.2	875.437	438.726	2	STTDLPSR	LAAO [O93364] (Crotalus adamanteus)
	923.514	462.764	2	FEPPLPPK
	969.517	485.766	2	VQVHFNAR
	1001.51	501.765	2	NGLTATSNPK
	1063.48	532.747	2	NPLEEcFR
	1113.58	557.796	2	VIEIQQNDR
	1221.56	611.786	2	DWYANLGPMR
	1226.65	614.333	2	EKVQVHFNAR
	1235.65	618.834	2	SAAQLYVESLR
	1259.56	630.788	2	FWEDDGIHGGK
	1349.66	675.836	2	KDWYANLGPMR
	1387.65	694.835	2	KFWEDDGIHGGK
	1477.75	739.884	2	KKDWYANLGPMR
	1508.75	755.38	2	YILDKYDTYSTK
	2399.15	1200.58	2	RFDEIVGGMDQLPTSMYEAIK
	1051.61	351.542	3	FEPPLPPKK
	1226.65	409.892	3	EKVQVHFNAR
	1259.56	420.86	3	FWEDDGIHGGK
	1320.79	441.271	3	RIKFEPPLPPK
	1349.66	450.893	3	KDWYANLGPMR
	1387.65	463.557	3	KFWEDDGIHGGK
	1477.75	493.592	3	KKDWYANLGPMR
	1508.74	503.921	3	YILDKYDTYSTK
	2346.13	783.052	3	IYFAGEYTAQFHGWIDSTIK
	2399.15	800.724	3	RFDEIVGGMDQLPTSMYEAIK
	4436.08	1110.03	4	EGNLSPGAVDMIGDLLNEDSGYYVSFIESLKHDDIFGYEK
49669.3	801.443	401.729	2	GMVLPGTK	PIII-SVMP [T1E6U1] (Crotalus oreganus helleri)
	845.498	423.756	2	KTDLLTR
	1015.53	508.773	2	NNGDLDKIK
	1027.5	514.759	2	IPcAPEDVK
	1569.75	785.882	2	ENGNKIPcAPEDVK
	1697.85	849.93	2	KENGNKIPcAPEDVK
	2109.05	1055.53	2	ITVKPEADYTLNAFGEWR
	2936.15	1469.08	2	ASMSEcDPAEHcTGQSSEcPADVFHK
	1569.74	524.255	3	ENGNKIPcAPEDVK
	1697.84	566.953	3	KENGNKIPcAPEDVK
	2009.78	670.934	3	LKSGSQcGHGDccEQcK
	2109.06	704.026	3	ITVKPEADYTLNAFGEWR
	2936.16	979.726	3	ASMSEcDPAEHcTGQSSEcPADVFHK
	2936.15	735.044	4	ASMSEcDPAEHcTGQSSEcPADVFHK
	2952.14	739.043	4	ASMoxSEcDPAEHcTGQSSEcPADVFHK
	1078.49	540.255	2	DNIPTYDNK	PLA2 {Acidic} [A0A0K8RYR4] (Crotalus horridus)
	1504.54	753.277	2	ccFVHDccYGK
	1548.62	775.316	2	ENGEIVcGGDDPcK
	1583.74	792.878	2	DNIPTYDNKYWR
	1676.71	839.364	2	ENGEIVcGGDDPcKK
	1504.53	502.519	3	ccFVHDccYGK
	1583.74	528.921	3	DNIPTYDNKYWR
	1676.71	559.911	3	ENGEIVcGGDDPcKK
24712.6	1137.5	569.755	2	SVDFDSESPR	CRISP [F2Q6E6] (Crotalus horridus)
	1160.59	581.301	2	SVNPTASNMLK
	1232.59	617.3	2	SLVQQAGcQDK
	1316.69	659.352	2	RSVNPTASNMLK
	1536.67	769.342	2	MEWYPEAAANAER
	1605.77	803.893	2	WTEIIHGWHGENK
	1904.02	953.017	2	KPEIQNEIVDLHNSLR
	1536.67	513.229	3	MEWYPEAAANAER
	1904.01	635.678	3	KPEIQNEIVDLHNSLR
	1904.01	477.01	4	KPEIQNEIVDLHNSLR
	3023.5	756.882	4	SVDFDSESPRKPEIQNEIVDLHNSLR
46164.4	801.443	401.729	2	GMVLPGTK	P-III SVMP [C5H5D1] (Crotalus durissus cascavella)
	1024.48	513.246	2	FKGAGTEcR
	1196.43	599.22	2	DPccDAATcK
	1202.48	602.247	2	NNNGYcYNGK
	1427.51	714.764	2	DEcDMADVcTGR
	1613.6	807.809	2	TcRDPccDAATcK
	1697.68	849.847	2	AAKDEcDMADVcTGR
	1718.95	860.482	2	IIVQSSADVTLDLFAK
	1811.68	906.849	2	QGAQcAEGLccDQcR
	1154.46	385.826	3	EGNHYGYcR
	1613.6	538.875	3	TcRDPccDAATcK
	1697.68	566.902	3	AAKDEcDMADVcTGR
	1713.68	572.233	3	AAKDEcDMoxADVcTGR
	2080.87	694.63	3	LRQGAQcAEGLccDQcR
	2902.22	968.414	3	TDVVSPAVcGNYFVEVGEEcDcGSPR
28152.1	1002.56	502.285	2	DKDIMLIR	Serine Protease {Thrombin-like} [T1E3B5] (Crotalus horridus)
	1062.53	532.273	2	EKFIcPNR
	1102.53	552.271	2	VLNEDEQTR
	1189.62	595.815	2	IMGWGTISPTK
	1230.62	616.317	2	KVLNEDEQTR
	1442.7	722.358	2	VLNEDEQTRDPK
	1062.53	355.183	3	EKFIcPNR
	1230.62	411.214	3	KVLNEDEQTR
	1489.74	497.589	3	DDEKDKDIMLIR
53638.1	1098.57	550.293	2	VHQMVNIMK	P-II SVMP [P34182] (Crotalus atrox)
	1553.78	777.899	2	STGVVQDHSEINLR
	1098.57	367.196	3	VHQMVNIMK
	1553.78	518.935	3	STGVVQDHSEINLR
	1709.88	570.968	3	RSTGVVQDHSEINLR
	1709.88	428.477	4	RSTGVVQDHSEINLR
53813.5	843.483	422.749	2	ETVLLNR	P-II SVMP [C9E1R9] (Crotalus viridis viridis)
	1156.46	579.238	2	AYTGSMcDPR
	1326.73	664.371	2	YIELVIVADHR
	1902.02	952.015	2	IWVHEIVNTINVFYR
	1919.75	960.882	2	GDNPDDRcTGQSADcPR
	1326.73	443.251	3	YIELVIVADHR
	1902.01	635.011	3	IWVHEIVNTINVFYR
	2049.88	684.3	3	LRPGAQcAEGLccDQcR
	2146.89	716.636	3	ARGDNPDDRcTGQSADcPR
	1919.75	640.924	3	GDNPDDRcTGQSADcPR
	2146.89	537.729	4	ARGDNPDDRcTGQSADcPR
54826.5	861.437	431.726	2	ETVLMNR	P-II SVMP [J3SBP9] (Crotalus adamanteus)
	1700.94	851.475	2	VALIGLEIWSSGELSK
	1713.8	857.908	2	MAHELGHNLGIDHDR
	1896.71	949.361	2	GDWNDDTCTGQSADcPR
	1953.72	977.867	2	GDWNDDTcTGQSADcPR
	1986.8	994.406	2	LTTGSQcAEGLccDQcK
	1713.8	572.275	3	MAHELGHNLGIDHDR
	1896.7	633.24	3	GDWNDDTCTGQSADcPR
	1953.72	652.248	3	GDWNDDTcTGQSADcPR
	1713.8	429.457	4	MAHELGHNLGIDHDR
53467.6	1098.57	550.293	2	VHQMVNIMK	P-II SVMP [Q2QA03] (Crotalus durissus durissus)
	1746.93	874.47	2	VAVTMTHELGHNLGIR
	2730.11	1366.06	2	HDTGScScGGYScIMSPVISDEPSK
	1098.57	367.196	3	VHQMVNIMK
	1746.92	583.313	3	VAVTMTHELGHNLGIR
	2730.11	911.044	3	HDTGScScGGYScIMSPVISDEPSK
	1746.92	437.738	4	VAVTMTHELGHNLGIR
42298.9	1120.55	374.52	3	MASTPHPPGAR	Glutaminyl-peptide cyclotransferase [M9NCD3] (Sistrurus catenatus tergeminus)
	2794.34	932.45	3	LQGLQAGWLVEEDTFQSHTPYGYR
	895.428	448.721	2	YKDDLDK	P-III SVMP [A0A0K8RYQ3] (Crotalus horridus)
	2620.28	1311.15	2	SHDNAQLLTTIDFDGDTVGLAYVR
	2620.28	874.434	3	SHDNAQLLTTIDFDGDTVGLAYVR
	2748.37	688.1	4	KSHDNAQLLTTIDFDGDTVGLAYVR
1063.1	1062.55	532.28	2	TPPAGPDVGPR	Bradykinin Inhibitor Peptide [P0CJ34] (Crotalus atrox)
	1062.54	355.19	3	TPPAGPDVGPR
54822.6	1312.71	657.364	2	YIELVVVADHR	P-II SVMP [ J9Z332] (Crotalus adamanteus)
	1700.94	851.475	2	VALIGLEIWSSGELSK
	1713.8	857.908	2	MAHELGHNLGIDHDR
	1896.71	949.361	2	GDWNDDTCTGQSADcPR
	1953.72	977.867	2	GDWNDDTcTGQSADcPR
	1986.8	994.406	2	LTTGSQcAEGLccDQcK
	1312.72	438.579	3	YIELVVVADHR
	1713.8	572.275	3	MAHELGHNLGIDHDR
	1896.7	633.24	3	GDWNDDTCTGQSADcPR
	1953.72	652.248	3	GDWNDDTcTGQSADcPR
	1713.8	429.457	4	MAHELGHNLGIDHDR
53663.6	905.452	453.733	2	YHFVANR	P-II SVMP [F8S104] (Crotalus adamanteus)
	1326.73	664.371	2	YIELVIVADHR
	1356.6	679.307	2	YEGDKTEIcSR
	1713.8	857.908	2	MAHELGHNLGIDHDR
	1986.8	994.406	2	LTTGSQcAEGLccDQcK
	1148.58	383.868	3	SRYHFVANR
	1326.73	443.25	3	YIELVIVADHR
	1356.6	453.207	3	YEGDKTEIcSR
	1713.8	572.274	3	MAHELGHNLGIDHDR
	1713.8	429.457	4	MAHELGHNLGIDHDR
61079.1	1027.5	514.759	2	IPcAPEDVK	P-III SVMP [F8S112] (Crotalus adamanteus)
	1677.6	839.809	2	NcQYQccDAATcK
	1780.72	891.366	2	LYcNDNSPGQNDPcK
	1911.97	956.994	2	TWVYEIVNTLNEIYR
	2874.25	1438.13	2	TDIISPPVcGNELLEAGEEcDcGSPR
	1677.6	560.209	3	NcQYQccDAATcK
	1780.72	594.579	3	LYcNDNSPGQNDPcK
	2874.25	959.089	3	TDIISPPVcGNELLEAGEEcDcGSPR
91755.1	818.43	410.222	2	SIPFEAR	PDE [J3SBP3] (Crotalus adamanteus)
	837.482	419.748	2	IQIHTAR
	1065.5	533.76	2	cSSITELEK
	1863.88	932.948	2	AGYLENWDSLMPNINK
	2131.06	711.362	3	RPDFLTLYIEEPDTTGHK
	2310.14	771.053	3	NPAWWGGQPIWHTATYQGLK
	2963.37	988.796	3	NGLNVISGPIFDYNYDGHFDSYDTIK
	3396.6	850.158	4	VLSFILPHRPDNSEScADTSPENLWVEER
17461.3	839.422	420.718	2	TVSFVcK	C-type Lectin [F8S0Z0] (Crotalus adamanteus)
	1251.65	626.83	2	RPYcTVMVVK
	1583.73	792.873	2	WQWSDDTKLDYK
	1814.73	908.375	2	TWDDAESFcYTQHR
	1814.74	605.919	3	TWDDAESFcYTQHR
46806.7	1312.71	657.36	2	YIELVVVADHR	P-I SVMP [Q90391] (Crotalus atrox)
	1560.8	781.41	2	VHELVNTINGFYR
	1312.72	438.58	3	YIELVVVADHR
	1560.8	521.27	3	VHELVNTINGFYR
16938.8	1414.65	708.33	2	TcLGLEQDTNHK	C-type Lectin [B0VXV2] (Sistrurus catenatus edwardsii)
	1414.65	472.56	3	TcLGLEQDTNHK
24735.7	929.5	465.76	2	EWAVGIAGK	Vespryn [F8S122] (Crotalus adamanteus)
	1518.78	760.4	2	NVGVPQVVPDNPER
	1518.78	507.27	3	NVGVPQVVPDNPER
13973.7	1504.54	753.28	2	ccFVHDccYGK	Acidic PLA2 [P14418] (Gloydius halys)
	1504.54	502.52	3	ccFVHDccYGK
	3061.24	1021.42	3	SGMFWYSNYGCYCGWGGQGRPQDATDR
7450.1	1896.71	949.361	2	GDWNDDTCTGQSADcPR	Disintegrin [P0C7X6] (Crotalus horridus)
	1953.72	977.867	2	GDWNDDTcTGQSADcPR
	2200.77	1101.39	2	GEECDcGSPANPccDAATcK
	2257.78	1129.9	2	GEEcDcGSPANPccDAATcK
	1896.7	633.24	3	GDWNDDTCTGQSADcPR
	1953.72	652.248	3	GDWNDDTcTGQSADcPR
	2200.76	734.595	3	GEEcDcGSPANPCcDAATcK
	2257.78	753.6	3	GEEcDcGSPANPccDAATcK
27741.3	792.402	397.208	2	EPGVYTK	Serine Protease {Thrombin-like} [B0VXT7] (Sistrurus catenatus edwardsii)
	1002.56	502.285	2	DKDIMLIR
	1062.53	532.273	2	EKFIcPNR
	1117.58	559.798	2	TLcAGILEGGK
	1289.67	645.842	2	GNMLIFFGVHR
	1488.76	745.389	2	NDEKDKDIMLIR
	1062.53	355.183	3	EKFIcPNR
	1488.76	497.26	3	NDEKDKDIMLIR
28204.6	792.402	397.208	2	EPGVYTK	Serine Protease {Kallikrein-like} [T1DMM6] (Crotalus oreganus helleri)
	1002.56	502.285	2	DKDIMLIR
	1062.53	532.273	2	EKFIcPNR
	1117.58	559.798	2	TLcAGILEGGK
	1189.62	595.815	2	IMGWGTISPTK
	1649.79	825.903	2	TLcAGILEGGKDTcR
	1062.53	355.183	3	EKFIcPNR
	1488.76	497.262	3	DNEKDKDIMLIR
	1649.79	550.937	3	TLcAGILEGGKDTcR
25413	1117.58	559.798	2	TLcAGILEGGK	Serine Protease {Thrombin-like} [P82981] (Agkistrodon contortrix contortrix)
	1497.67	749.841	2	VVGGDEcNINEHR
	1497.66	500.229	3	VVGGDEcNINEHR
69512.6	815.487	408.751	2	ATDLLKR	P-III SVMP [O42138] (Agkistrodon contortrix laticinctus)
	1982.77	992.395	2	LTPGSQcADGVccDQcR
	1982.77	661.932	3	LTPGSQcADGVccDQcR
18549.3	978.43	490.22	2	MTWADAER	C-type Lectin {Alpha Subunit} [A0A068B4V7] (Gloydius intermedius)
58546	875.43	438.72	2	STTDLPSR	LAAO [K9N7B7] (Crotalus durissus cumanensis)
	2090.98	1046.5	2	LNEFFQENENAWYFIK
	2090.97	698	3	LNEFFQENENAWYFIK
56829	875.437	438.726	2	STTDLPSR	LAAO [K9N7B7] (Crotalus durissus cumanensis)
	923.514	462.764	2	FEPPLPPK
	969.517	485.766	2	VQVHFNAR
	1063.48	532.746	2	NPLEEcFR
	1113.58	557.796	2	VIEIQQNDR
	1221.56	611.786	2	DWYANLGPMR
	1226.65	614.333	2	EKVQVHFNAR
	1235.65	618.834	2	SAAQLYVESLR
	1349.66	675.837	2	KDWYANLGPMR
	1477.75	739.884	2	KKDWYANLGPMR
	1508.75	755.38	2	YILDKYDTYSTK
	2399.15	1200.58	2	RFDEIVGGMDQLPTSMYEAIK
	1051.61	351.542	3	FEPPLPPKK
	1226.65	409.892	3	EKVQVHFNAR
	1320.79	441.271	3	RIKFEPPLPPK
	1349.66	450.893	3	KDWYANLGPMR
	1477.75	493.592	3	KKDWYANLGPMR
	1508.74	503.921	3	YILDKYDTYSTK
	2063.07	688.698	3	DcADIVINDLSLIHQLPK
	2346.13	783.052	3	IYFAGEYTAQFHGWIDSTIK
	2399.15	800.724	3	RFDEIVGGMDQLPTSMYEAIK
	3232.7	1078.57	3	HVVIVGAGMAGLSAAYVLAGAGHQVTVLEASER
	3232.7	809.183	4	HVVIVGAGMAGLSAAYVLAGAGHQVTVLEASER
	4436.08	1110.03	4	EGNLSPGAVDMIGDLLNEDSGYYVSFIESLKHDDIFGYEK
67946.3	895.43	448.82	2	YKDDLDK	P-III SVMP [B0VXU4] (Sistrurus catenatus edwardsii)
	1024.48	513.25	2	FKGAGTEcR
	2207.17	1104.59	2	IYEIVNTMNEIYIPLNIR
16788.6	1351.61	676.81	2	MLAHFVcEFQA	C-type Lectin [T1E3D6] (Crotalus horridus)
	1466.65	734.33	2	cSWQWSNGAMLK
	1887.77	944.89	2	YEDWAEESYcVYFK
64818.6	858.48	430.25	2	IINVGSEK	PDE {Ecto-5'-nucleotidase} [T1E3Y5] (Crotalus horridus)
	873.47	427.74	2	VFPAVEGR
	950.54	476.28	2	VGIIGYTTK
	1342.54	672.28	2	cTGQDcYGGVAR
	1528.76	510.59	3	IIALGHSGFSEDQR
7780.6	1919.75	960.88	2	GDNPDDRcTGQSADcPR	Disintegrin [P31985] (Crotalus oreganus cerberus)
	2457.86	1229.94	2	EAGEEcDcGSPANPccDAATcK
	1919.75	640.92	3	GDNPDDRcTGQSADcPR
	2049.87	684.3	3	LRPGAQcAEGLccDQcR
	2146.89	716.64	3	ARGDNPDDRcTGQSADcPR
	2457.86	820.29	3	EAGEEcDcGSPANPccDAATcK
	2146.89	537.73	4	ARGDNPDDRcTGQSADcPR
46769.7	859.44	430.73	2	ETDLLNR	P-I SVMP [Q90392] (Crotalus atrox)
	987.54	494.78	2	ETDLLNRK
	1312.71	657.36	2	YIELVVVADHR
	1312.72	438.58	3	YIELVVVADHR
	801.443	401.729	2	GMVLPGTK	P-III SVMP [A0A0K8RYQ1] (Crotalus horridus)
	845.498	423.756	2	KTDLLTR
	1015.53	508.773	2	NNGDLDKIK
	1027.5	514.759	2	IPcAPEDVK
	1569.75	785.882	2	ENGNKIPcAPEDVK
	1537.63	769.823	2	VcSNGHcVDVASAY
	1697.85	849.93	2	KENGNKIPcAPEDVK
	2936.15	1469.08	2	ASMSEcDPAEHcTGQSSEcPADVFHK
	1569.74	524.255	3	ENGNKIPcAPEDVK
	1697.84	566.953	3	KENGNKIPcAPEDVK
	2009.78	670.934	3	LKSGSQcGHGDccEQcK
	2936.16	979.726	3	ASMSEcDPAEHcTGQSSEcPADVFHK
	2936.15	735.044	4	ASMSEcDPAEHcTGQSSEcPADVFHK
	2952.14	739.043	4	ASMoxSEcDPAEHcTGQSSEcPADVFHK
68290.7	801.443	401.729	2	GMVLPGTK	P-III SVMP [Q2QA02] (Crotalus durissus durissus)
	845.498	423.756	2	KTDLLTR
	1027.5	514.759	2	IPcAPEDVK
	1569.75	785.882	2	ENGNKIPcAPEDVK
	1614.78	808.396	2	MYELANTVNEIYR
	1697.85	849.93	2	KENGNKIPcAPEDVK
	2936.17	1469.09	2	ASMSEcDPAEHcTGQSSEcPADVFHK
	1569.74	524.255	3	ENGNKIPcAPEDVK
	1697.84	566.953	3	KENGNKIPcAPEDVK
	2009.78	670.934	3	LKSGSQcGHGDccEQcK
	2936.16	979.726	3	ASMSEcDPAEHcTGQSSEcPADVFHK
	2936.15	735.044	4	ASMSEcDPAEHcTGQSSEcPADVFHK
	2952.14	739.042	4	ASMoxSEcDPAEHcTGQSSEcPADVFHK
28626.4	1036.54	519.278	2	AAHGGLPATSR	Serine Protease (Kallikrein-like) [T1DE77] (Crotalus oreganus helleri)
	1188.63	595.323	2	WDKDIMLIR
	2577.17	860.064	3	ETYPDVPHcANINILDYEVcR
15597.8	801.46	401.73	2	AVAIcLR	PLA2 {Basic} (~K49) [Q8UVZ7] (Crotalus atrox)
	995.46	498.74	2	ENLDTYNK
	1123.55	562.78	2	ENLDTYNKK
	1123.55	375.52	3	ENLDTYNKK
	1748.92	875.466	2	YVELVIVVDHGMFTK	P-II SVMP [A0A0K8RYQ8] (Crotalus horridus)
	1896.71	949.361	2	GDWNDDTCTGQSADcPR
	1953.72	977.867	2	GDWNDDTcTGQSADcPR
	1748.92	583.98	3	YVELVIVVDHGMFTK
	1896.7	633.24	3	GDWNDDTCTGQSADcPR
	1953.72	652.248	3	GDWNDDTcTGQSADcPR
22921.1	3238.7	1095.24	3	STAVIQDHSEIDLLVAVTMDHELGHNLGIR	P-I SVMP [P86976] (Bothrops barnetti)
	3282.7	657.55	5	STAVIQDHSEIDLLVAVTMDHELGHNLGIR
27839.2	1101.55	551.78	2	TLcAGIPEGGK	Serine Protease (Kallikrein-like) [T1DMP4] (Crotalus oreganus helleri)
	1214.59	608.3	2	KVPNEDEQTR
	1214.59	405.87	3	KVPNEDEQTR
	3498.67	1167.24	3	TLPDVPYcANINLLDDAVcQPPYPELPATSR
64118	842.49	422.25	2	NVIIEQK	Phospholipase B [A0A077L7E7] (Protobothrops elegans)
	904.47	453.23	2	VADISMAAK
	1036.47	519.24	2	IANMMADSGK
	1435.66	718.84	2	HGLEFSYEMAPR
	1703.9	852.96	2	SLEDGTLYIIEQVPK
	1435.66	479.56	3	HGLEFSYEMAPR
26416.7	1117.58	559.798	2	TLcAGILEGGK	Serine Protease {Thrombin-like} [Q6T5L0] (Gloydius shedaoensis)
	1214.59	608.302	2	KVPNEDEQTR
	1511.68	756.849	2	VIGGDEcNINEHR
	1649.79	825.903	2	TLcAGILEGGKDTcR
	1214.59	405.871	3	KVPNEDEQTR
	1511.68	504.901	3	VIGGDEcNINEHR
	1649.79	550.937	3	TLcAGILEGGKDTcR
17054.1	948.45	475.23	2	LEWTDGTK	C-type Lectin [B0VXV0] (Sistrurus catenatus edwardsii)
	1453.71	727.86	2	LEWTDGTKVDYK
	1453.71	485.58	3	LEWTDGTKVDYK
35934.3	1027.5	514.76	2	IPcAPEDVK	Dis-Cys Fragment [E9JG43] (Echis carinatus sochureki)
	1584.75	793.38	2	ENDAKIPcAPEDVK
	1584.7	529.25	3	ENDAKIPcAPEDVK
17828.4	2106.84	1054.43	2	GSGADCPFGWSSHDKYCYK	C-type Lectin [A0A098M248] (Hypsiglena sp.)
	2163.87	722.3	3	GSGADCPFGWSSHDKYcYK
28574	931.42	466.72	2	YFcLSSR	Serine Protease {Thrombin-like} [T1DJX6] (Crotalus horridus)
	1117.58	559.8	2	TLcAGILEGGK
	1188.63	595.32	2	WDKDIMLIR
28165.1	1117.58	559.798	2	TLcAGILEGGK	Serine Protease {Thrombin-like} [Q91511] (Protobothrops mucrosquamatus)
	1189.62	595.815	2	IMGWGTISPTK
	1228.58	615.295	2	GIIAGNTDATCPP
	1285.6	643.808	2	GIIAGNTDATcPP
	1638.76	820.385	2	cANINLLDYEVcR
15805.5	1576.56	789.29	2	ccFVHDccYEK	PLA2 {Basic} [A0A0B4U791] (Protobothrops tokarensis)
55815.2	801.443	401.729	2	GMVLPGTK	P-III SVMP [B0VXU9] (Sistrurus catenatus edwardsii)
	1024.48	513.246	2	FKGAGTEcR
	1196.43	599.22	2	DPccDAATcK
	1202.48	602.247	2	NNNGYcYNGK
	1613.6	807.809	2	TcRDPccDAATcK
	1720.87	861.441	2	MYDTVNVITPIYHR
	1811.68	906.85	2	QGAQcAEGLccDQcR
	1613.6	538.875	3	TcRDPccDAATcK
	1720.86	574.628	3	MYDTVNVITPIYHR
	2080.87	694.63	3	LRQGAQcAEGLccDQcR
	2902.22	968.414	3	TDVVSPAVcGNYFVEVGEEcDcGSPR
27779.6	1002.56	502.285	2	DKDIMLIR	Serine Protease (Kallikrein-like) [T1DED9] (Crotalus oreganus helleri)
	1029.56	515.785	2	GLNKDVQTR
	1062.53	532.273	2	EKFIcPNR
	1129.62	565.817	2	ILcAGILEGGK
	1289.67	645.842	2	GNMLIFFGVHR
	1488.76	745.389	2	NDEKDKDIMLIR
	1062.53	355.183	3	EKFIcPNR
	1488.76	497.26	3	NDEKDKDIMLIR
22596.4	1560.8	781.41	2	VHEIVNTLNGFYR	P-I SVMP [P22796] (Lachesis muta muta)
	1560.8	521.27	3	VHEIVNTLNGFYR
	1817.96	606.99	3	TRVHEIVNTLNGFYR
	1817.96	455.5	4	TRVHEIVNTLNGFYR
7703.4	1919.75	960.882	2	GDNPDDRcTGQSADcPR	Disintegrin [P31981] (Crotalus basiliscus)
	2328.82	1165.42	2	AGEEcDcGSPANPccDAATcK
	1919.75	640.924	3	GDNPDDRcTGQSADcPR
	2049.88	684.3	3	LRPGAQcAEGLccDQcR
	2146.89	716.636	3	ARGDNPDDRcTGQSADcPR
	2328.82	777.281	3	AGEEcDcGSPANPccDAATcK
	2146.89	537.729	4	ARGDNPDDRcTGQSADcPR
26016.6	931.42	466.72	2	YFcLSSR	Serine Protease {Thrombin-like} [Q8UUJ1] (Gloydius ussuriensis)
	1117.58	559.8	2	TLcAGILEGGK
	2607.17	870.06	3	FQcGGTLINEEWVLTAAHcDMR
12977	1024.48	513.25	2	FKGAGTEcR	P-III SVMP (Fragment) [A0A077L6T2] (Protobothrops flavoviridis)
	1267.47	637.74	2	AEGLccDQcR
32710.9	2196.83	733.28	3	LHSWVEcESGEccEQcK	P-III SVMP [F8S110] (Crotalus adamanteus)
28457	1129.62	565.82	2	ILcAGILEGGK	Serine Protease {Plasminogen Activator} [T1D6M5] (Crotalus horridus)
	1346.68	674.35	2	AAYPWWPVTTR
	1580.74	791.38	2	cANINILDYAVcR
	1660.83	554.62	3	TNNEWEKDIMLIR
28278.1	1117.58	559.8	2	(R)TLcAGILEGGK(D)	Serine Protease {Thrombin-like} [B0VXT4] (Sistrurus catenatus edwardsii)
	1189.62	595.82	2	(R)IMGWGTISPTK(V)
	2469.16	1235.59	2	VFDHLDWIQSIIAGNTDATcPP
	2469.16	824.06	3	VFDHLDWIQSIIAGNTDATcPP
58768.8	875.437	438.726	2	STTDLPSR	LAAO [P56742] (Crotalus atrox)
	923.514	462.764	2	FEPPLPPK
	969.517	485.766	2	VQVHFNAR
	1001.51	501.765	2	NGLTATSNPK
	1063.48	532.746	2	NPLEEcFR
	1113.58	557.796	2	VIEIQQNDR
	1221.56	611.786	2	DWYANLGPMR
	1226.65	614.333	2	EKVQVHFNAR
	1235.65	618.834	2	SAAQLYVESLR
	1349.66	675.837	2	KDWYANLGPMR
	1477.75	739.884	2	KKDWYANLGPMR
	1508.75	755.38	2	YILDKYDTYSTK
	2399.15	1200.58	2	RFDEIVGGMDQLPTSMYEAIK
	1051.61	351.542	3	FEPPLPPKK
	1226.65	409.892	3	EKVQVHFNAR
	1320.79	441.271	3	RIKFEPPLPPK
	1477.75	493.592	3	KKDWYANLGPMR
	1349.66	450.893	3	KDWYANLGPMR
	1508.74	503.921	3	YILDKYDTYSTK
	2063.07	688.698	3	DcADIVINDLSLIHQLPK
	2346.13	783.052	3	IYFAGEYTAQFHGWIDSTIK
	2399.15	800.724	3	RFDEIVGGMDQLPTSMYEAIK
	4436.06	1110.02	4	EGNLSPGAVDMIGDLLNEDSGYYVSFIESLKHDDIFGYEK
16000.1	1161.53	581.77	2	TDIYSYSWK	PLA2 {Basic} [Q71QE8] (Crotalus viridis viridis)
	1576.55	789.28	2	ccFVHDccYEK
13850.3	744.44	373.23	2	SLVELGK	PLA2 (MyoTX-II Chain A) [I6L8L6] (Bothrops brazili) {Basic}
	801.46	401.73	2	AVAIcLR
	995.46	498.74	2	ENLDTYNK
	1123.55	375.52	3	ENLDTYNKK
15695.4	1161.53	581.77	2	TDIYSYSWK	PLA2 {Basic} [B0LSG5_SISMI] (Sistrurus miliarius)
	2127.89	1064.95	2	NAIPFYTSYGcYcGWGGR
23600.2	1027.5	514.759	2	IPcAPEDVK	P-III SVMP [Q9PSN7] (Crotalus ruber ruber)
	1537.63	769.823	2	VcSNGHcVDVASAY
	2687	896.675	3	SEcDIAEScTGQSADcPMDDFHR
36669.5	853.5	427.76	2	ILNEPLR	Dis-Cys Frag [Q6T271] (Bitis gabonica)
28116	1115.6	558.81	2	VLcAGILEGGK	Serine Protease {Thrombin-like} [B0VXU3] (Sistrurus catenatus edwardsii)
46785.3	815.49	408.75	2	ATDLLKR	P-III SVMP [P0DM89] (Gloydius brevicaudus)
59060	875.43	438.72	2	STTDLPSR	LAAO [Q4JHE2] (Notechis scutatus scutatus)
	1133.52	567.77	2	YPVEPSEEGK
26728.6	1362.63	682.32	2	ALTMEGNQASWR	Nerve Growth Factor CohID [T1DEA2] (Crotalus oreganus helleri)
15583.6	801.46	401.73	2	AVAIcLR	PLA2 {Basic} [Q6JK69] (Bothrops atrox)
	805.4	403.71	2	TIVcGEK
	995.46	498.74	2	ENLDTYNK
	1123.55	562.78	2	ENLDTYNKK
	1123.55	375.52	3	ENLDTYNKK
?	889.51	445.76	2	IHLGVHSK	Serine Protease {Thrombin-like} [A0A0K8RYP4] (Crotalus horridus)
	1117.58	559.8	2	TLcAGILEGGK
	1189.62	595.82	2	IMGWGTISPTK
	1393.7	697.86	2	AAYPQYGLPATSR
8008.1	1094.54	548.28	2	YNSNIDTIR	P-I SVMP (Fragment) [P0C6S1] (Bothrops pauloensis)
13356.9	2929.47	977.5	3	LDKPVSNSEHIAPLSLPSSPPSVGSVcR	Serine Protease {Thrombin-like} [P0DJG3] (Bothrocophias andianus)
52466.2	2025.88	676.3	3	TKPDQYTGEcPDIEMSR	Hyaluronidase [U3TBU1] (Ovophis okinavensis)
28025.5	1002.56	502.285	2	DKDIMLIR	Serine Protease {Thrombin-like} [Q9DF66] (Protobothrops jerdonii)
	1102.53	552.271	2	VLNEDEQTR
	1116.6	559.305	2	TLcAGILQGGK
	1230.62	616.317	2	KVLNEDEQTR
	1442.7	722.358	2	VLNEDEQTRDPK
	1230.62	411.214	3	KVLNEDEQTR
	1489.74	497.589	3	DDEKDKDIMLIR
?	1919.75	960.882	2	GDNPDDRcTGQSADcPR	P-II SVMP [A0A0K8RZ12] (Crotalus horridus)
	1919.75	640.924	3	GDNPDDRcTGQSADcPR
	2058.86	687.293	3	LRPGAQcAEGLccDHcR
	2146.89	716.636	3	ARGDNPDDRcTGQSADcPR
	2146.89	537.729	4	ARGDNPDDRcTGQSADcPR
15962.3	1561.56	521.53	2	ccFVHDccYNK	PLA2 {Basic} [T1DH13] (Crotalus horridus)
7575.5	1952.79	651.94	3	GDFPDDRcTGQSADcPR	Disintegrin [P21859] (Protobothrops flavoviridis)
5713.6	996.33	499.17	2	ccFVHDc	PLA2 {Basic} [B3A0N3] (Bothrops marajoensis)
63254.1	1027.5	514.76	2	IPcAPEDVK	P-III SVMP [E9KJZ0] (Echis ocellatus)
	1109.52	555.77	2	TLDSFGEWR
16733.5	1467.63	734.82	2	cSWQWSDGAMLK	C-type Lectin [G9DCH9] (Crotalus oreganus helleri)
	1887.77	944.89	2	YEDWAEESYcVYFK
25742.2	1062.53	532.27	2	EKFIcPNR	Serine proteinase (Thrombin-like) [P81824] (Bothrops jararaca)
	1209.63	605.82	2	INILDHAVcR
	1062.53	355.18	3	EKFIcPNR
	1209.63	404.22	3	INILDHAVcR
1674.8	1050.46	526.24	2	VDFDSESPR	CRISP {Fragment} [P85099] (Philodryas patagoniensis)
16008.3	1211.5	606.7	2	LKEMcEcDK	PLA2 {Basic} [Q2YHJ9] (Trimeresurus puniceus)
36362.6	1975.7	659.57	3	GDDMoxDDYCNGKPCDcPR	PIII-SVMP [E9JGJ0] (Echis pyramidum)
16205.4	1277.57	639.79	2	LWNDQVcESK	C-type Lectin [P0DM36] (Agkistrodon piscivorus piscivorus)
